# Supplementary material for: A programmable omnipotent Argonaute nuclease from mesophilic bacteria Kurthia massiliensis
Source: PubMed Central journal article supplement — Nucleic Acids Res. 2021 Jan 14;49(3):1597–608. doi: 10.1093/nar/gkaa1278 (PMC7897485; doi:10.1093/nar/gkaa1278), 2021-01-14
Supplement: gkaa1278_supplemental_file.pdf [file gkaa1278_supplemental_file.pdf]

**A**

| Protein  | Source                                      | D                  | E                  | D                  | X                  | Identity(%) |
|----------|---------------------------------------------|--------------------|--------------------|--------------------|--------------------|-------------|
| TtAgo    | - <i>Thermus thermophilus</i>               | AVGF <b>D</b> AGGR | AQAG <b>E</b> RIPO | LLLR <b>D</b> GRVP | LHL <b>A</b> DRLVK | 17.95       |
| CbAgo    | - <i>Clostridium butyricum</i>              | FIGL <b>D</b> VGTR | PQSG <b>E</b> KIAE | VIHR <b>D</b> GFSR | TGY <b>A</b> DKICK | 22.26       |
| NgAgo    | - <i>Natronobacterium gregoryi</i>          | FIGL <b>D</b> VSR  | PQLG <b>E</b> KLQS | VIHR <b>D</b> GFMN | TAY <b>A</b> DQAST | 21.34       |
| RsAgo    | - <i>Rhodobacter Sphaeroides</i>            | VVGM <b>G</b> LAEL | ECEY <b>E</b> GYSD | RVVF <b>H</b> AHRP | IFYS <b>E</b> RIAE | 14.06       |
| MpAgo    | - <i>Marinitoga piezophila</i>              | YIGL <b>D</b> LSHD | LELN <b>E</b> KMNL | FILR <b>D</b> GRFI | LHI <b>A</b> NKVAL | 18.34       |
| LrAgo    | - <i>Limnothrix rosea</i>                   | IVGL <b>D</b> VSRR | VIDG <b>E</b> ILPE | LIHR <b>D</b> GLFP | TTY <b>A</b> DKIST | 21.09       |
| IbAgo    | - <i>Intestinibacter bartlettii</i>         | YIGL <b>D</b> VCRE | HQSG <b>E</b> KIQI | VFHR <b>D</b> GINR | TTY <b>A</b> DLSSI | 29.67       |
| CbcAgo   | - <i>Clostridium. butyricum</i> CWBI1009    | FIGL <b>D</b> VGTR | PQSG <b>E</b> KIAE | VIHR <b>D</b> GFSR | TGY <b>A</b> DKICK | 22.26       |
| CpAgo    | - <i>Clostridium perfringens</i>            | FVGL <b>D</b> VGTR | PQNG <b>E</b> KINT | VIHR <b>D</b> GFSR | TGY <b>A</b> DKICK | 22.21       |
| SeAgo    | - <i>Synechococcus elongates</i>            | IIGF <b>D</b> TGTN | VQRG <b>E</b> TFSG | LLMR <b>D</b> GLVQ | LHL <b>A</b> DRSSK | 18.70       |
| PfAgo    | - <i>Pyrococcus furiosus</i>                | IIGF <b>D</b> VAPM | EQRG <b>E</b> SVDM | LLLR <b>D</b> GRIT | VHY <b>A</b> HKFAN | 18.30       |
| MjAgo    | - <i>Methanocaldococcus jannaschii</i>      | IMGL <b>D</b> TLGL | PAPG <b>E</b> RLHL | LFLR <b>D</b> GFIQ | IHY <b>A</b> DKFVK | 15.77       |
| hAgo2    | - <i>Homo sapiens</i>                       | FLG <b>A</b> DVTHP | QHRQ <b>E</b> IIQD | IFYR <b>D</b> GVSE | AYY <b>A</b> HLVAF | 14.97       |
| KpAgo    | - <i>Kluyveromyces Polysporus</i>           | VLGS <b>D</b> VTHY | DGPG <b>E</b> EIIT | MYFR <b>D</b> GVSV | VYY <b>A</b> DLLCT | 13.55       |
| KmAgo    | - <i>Kurthia massiliensis</i>               | FIGL <b>D</b> VSHE | ILAG <b>E</b> KIDD | TIHR <b>D</b> GFWR | IHY <b>A</b> DLSAT | 100.00      |
| KmAgo_DM | - <i>Kurthia massiliensis</i> double mutant | FIGI <b>A</b> VSHE | ILAG <b>E</b> KIDD | TIHR <b>A</b> GFWR | IHY <b>A</b> DLSAT |             |

**B**

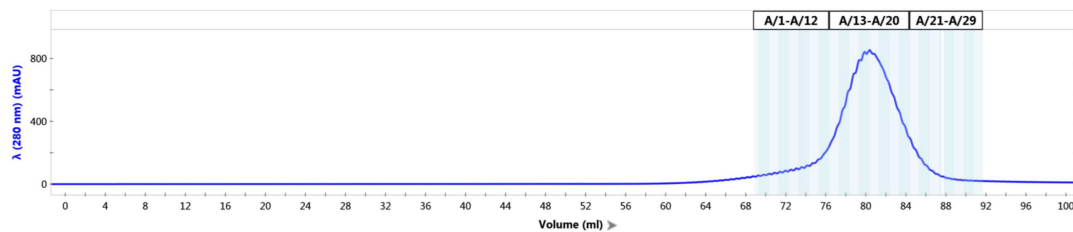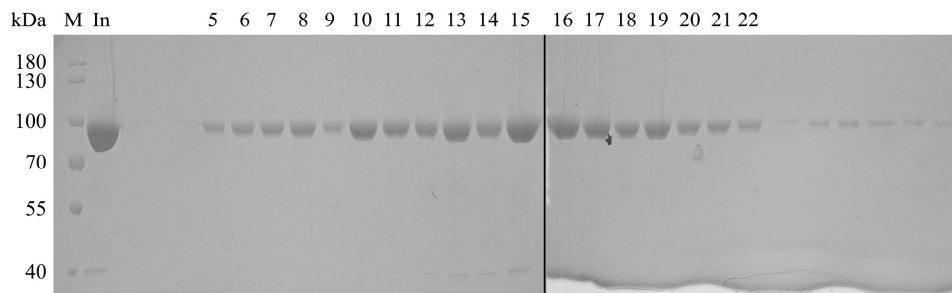

**C**

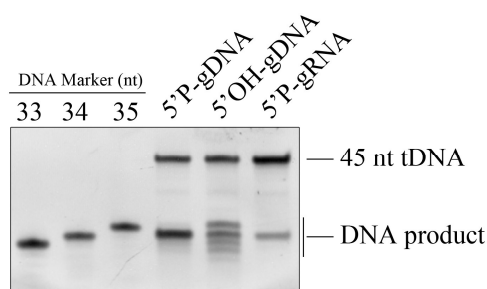

**D**

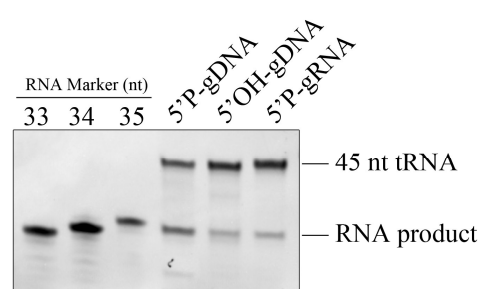

**Supplementary Figure S1.** KmAgo harbors a catalytic DEDD tetrad. (A) Multiple sequence alignment of KmAgo with several other biochemically or structurally characterized Ago proteins. The catalytically dead variant of the KmAgo protein (KmAgo\_DM) with amino acid substitutions within the catalytic tetrad is shown. The protein sequence identity of those Ago proteins between KmAgo are also shown. (B) Size exclusion diagram showing the elution peak of KmAgo (Upper panel). The purity of the purified KmAgo was determined using SDS-PAGE (Lower panel). M, marker; In, Heparin purified KmAgo; 5-22, chromatography fractions containing KmAgo. (C) Repeating experiment in Figure 1C with non-labeled tDNA. DNA marker

(33, 34, 35 nt) were partially hydrolyzed tDNA. (D) Repeating experiment in Figure 1D with non-labeled tRNA. RNA marker (33, 34, 35 nt) were partially hydrolyzed tRNA. The experiments in (C) and (D) were performed at the 4:2:1 KmAgo:guide:target molar ratio in reaction buffer containing  $Mn^{2+}$  ions for 30 min at 37 °C.

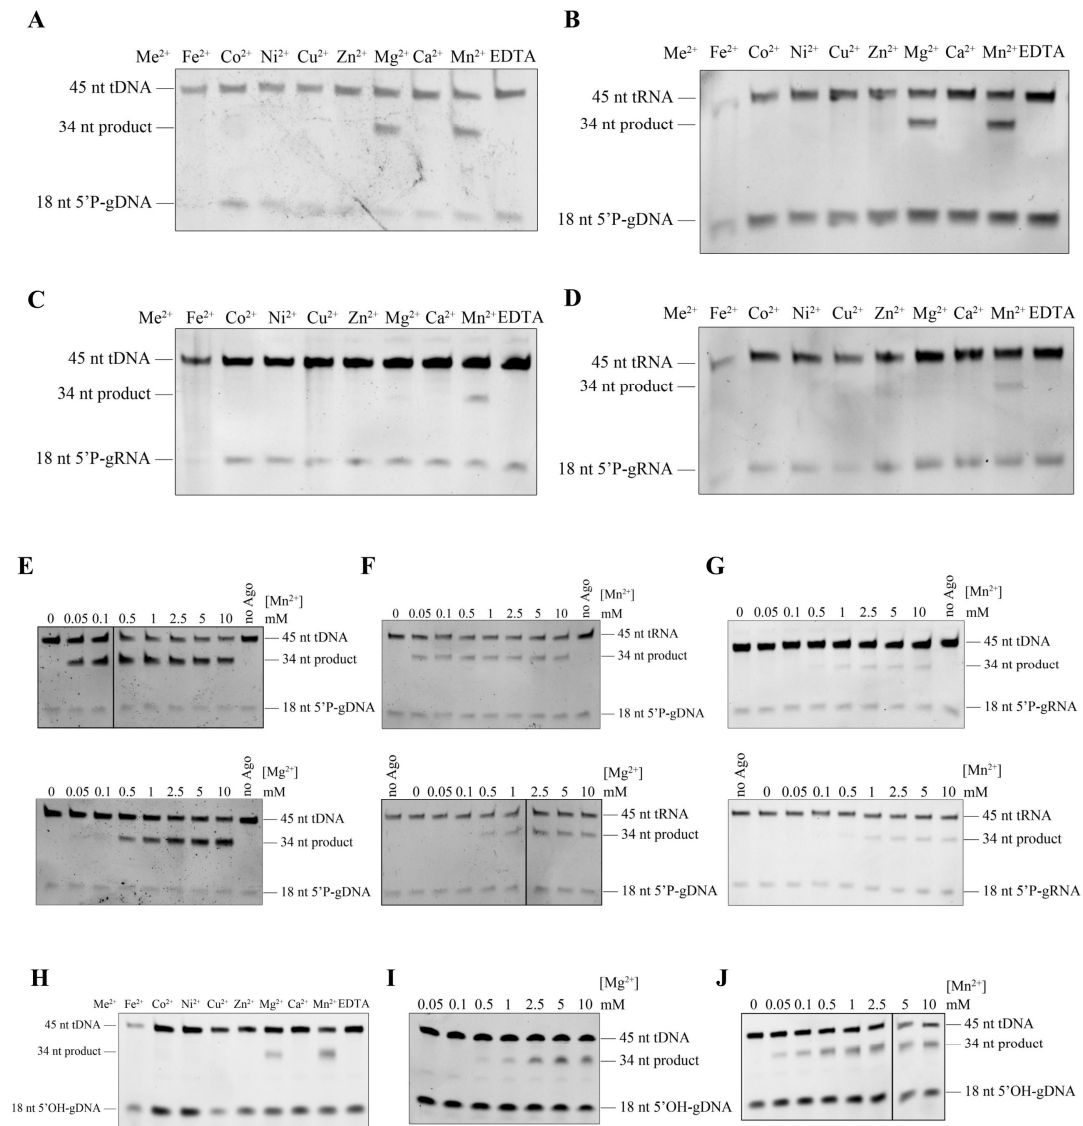

**Supplementary Figure S2.** Effects of different cations on KmAgo. (A) Effects of different cations on DNA cleavage activity mediated by 5'-P-gDNA. (B) Effects of different cations on RNA cleavage activity mediated by 5'-P-gDNA. (C) Effects of different cations on DNA cleavage activity mediated by 5'-P-gRNA. (D) Effects of different cations on RNA cleavage activity mediated by 5'-P-gRNA. (E) Effects of Mn<sup>2+</sup> concentration (Upper panel) and Mg<sup>2+</sup> concentration (Lower panel) on DNA cleavage activity mediated by 5'-P-gDNA. (F) Effects of Mn<sup>2+</sup> concentration (Upper panel) and Mg<sup>2+</sup> concentration (Lower panel) on RNA cleavage activity mediated by 5'-P-gDNA. (G) Effects of Mn<sup>2+</sup> concentration on DNA cleavage activity (Upper panel) and RNA cleavage activity (Lower panel) mediated by 5'-P-gRNA. (H) Effects of different cations on DNA cleavage activity mediated by 5'-OH-gDNA. (I) Effects of Mg<sup>2+</sup> concentration on DNA cleavage activity mediated by 5'-OH-gDNA. (J) Effects of Mn<sup>2+</sup> concentration on DNA cleavage activity mediated by 5'-OH-gDNA. All reactions were carried out for 15 min at 37 °C, at the 4:2:1 KmAgo:guide:target molar ratio (800 nM KmAgo preloaded with 400 nM guide, plus 200 nM target).

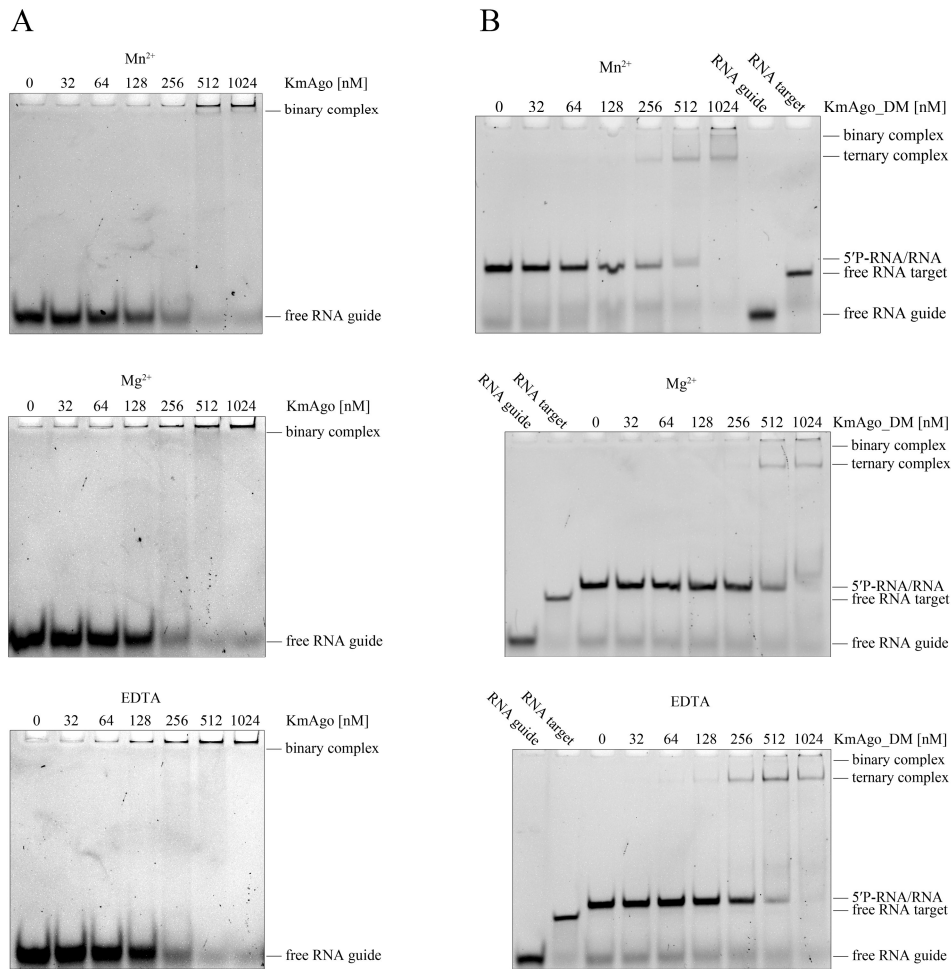

**Supplementary Figure S3.** Electrophoresis mobility shift assay (EMSA) of the binding of the KmAgo to 5'P-gRNA and 5'P-gRNA/tRNA duplex. (A) Effects of different cations on the loading of RNA guides to KmAgo. (Upper panel) 5 mM Mn<sup>2+</sup>, (Middle panel) 5 mM Mg<sup>2+</sup>, (Lower panel) 5 mM EDTA. (B) Effects of different cations on the loading of 5'P-gRNA/tRNA duplex to KmAgo\_DM. (Upper panel) 5 mM Mn<sup>2+</sup>, (Middle panel) 5 mM Mg<sup>2+</sup>, (Lower panel) 5 mM EDTA. The 5'P-gRNA and tRNA are 3' end FAM-labeled and 5' end FAM-labeled, respectively.

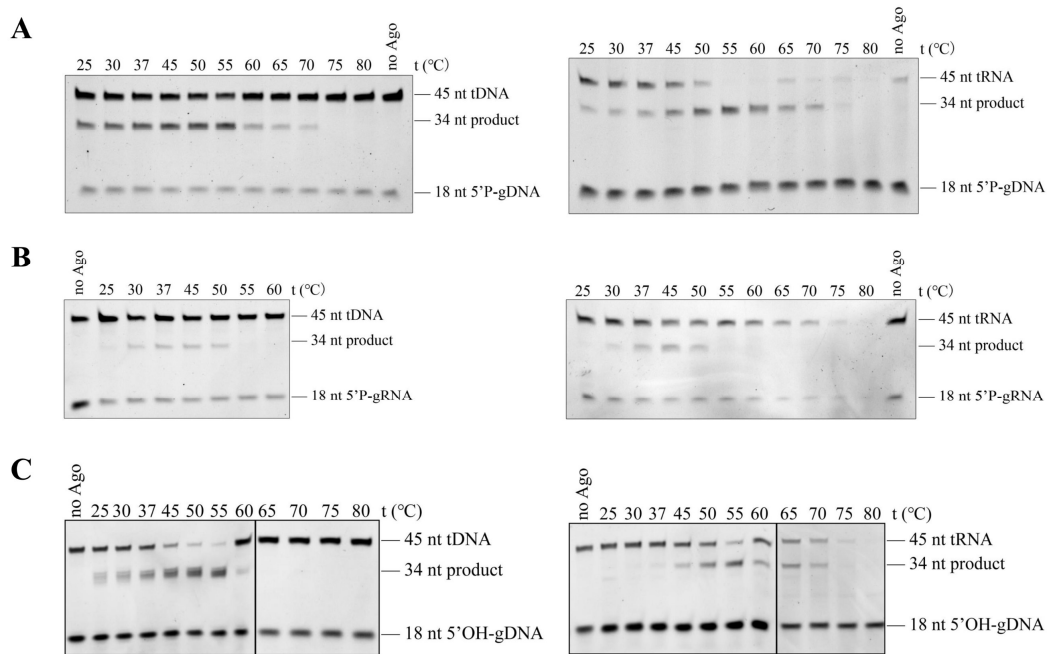

**Supplementary Figure S4.** Representative denaturing PAGE (one of three independent experiments) showing KmAgo activity with different temperatures. Cleavage efficiencies from three independent experiments were quantified and plotted against temperature (Figure 3). (A) Representative denaturing PAGEs (one of three independent experiments) showing effects of temperature on DNA cleavage activity (left panel) and RNA cleavage activity (right panel) using 5'P-gDNA. The no Ago reaction was carried out for 15 min at 80 °C. (B) Representative denaturing PAGEs (one of three independent experiments) showing effects of temperature on DNA cleavage activity (left panel) and RNA cleavage activity (right panel) using 5'P-gRNA. The no Ago reaction was carried out for 15 min at 37 °C. (C) Representative denaturing PAGEs (one of three independent experiments) showing effects of temperature on DNA cleavage activity (left panel) and RNA cleavage activity (right panel) using 5'OH-gDNA. The no Ago reaction was carried out for 15 min at 37 °C.

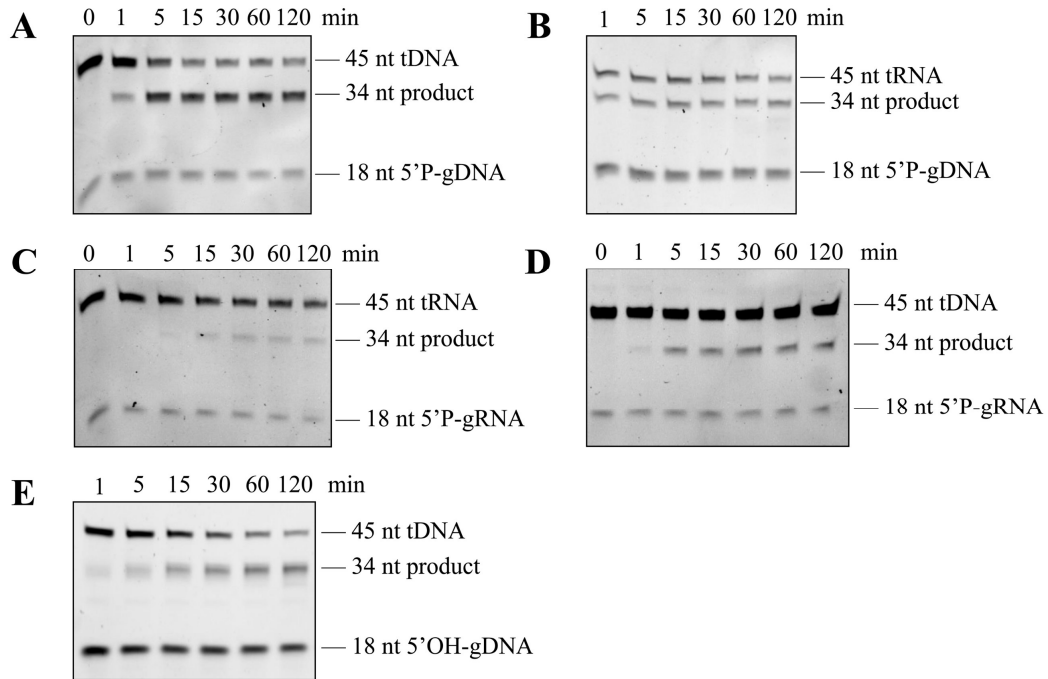

**Supplementary Figure S5.** Representative denaturing PAGE showing the results of DNA and RNA cleavage kinetics in the presence of 5 mM  $\text{MnCl}_2$ . Assays were performed in three independent replicates, and time points were taken at 0, 1, 5, 15, 30, 60, and 120 min. Cleavage efficiencies from three independent experiments were quantified and plotted against time (Figure 3D). (A) Representative denaturing PAGE (one of three independent experiments) showing DNA cleavage kinetics using 5'P-gDNA. (B) Representative denaturing PAGE (one of three independent experiments) showing RNA cleavage kinetics using 5'P-gDNA. (C) Representative denaturing PAGE (one of three independent experiments) showing RNA cleavage kinetics using 5'P-gRNA. (D) Representative denaturing PAGEs (one of three independent experiments) showing DNA cleavage kinetics using 5'P-gRNA. (E) Representative denaturing PAGE (one of three independent experiments) showing DNA cleavage kinetics using 5'OH-gDNA.

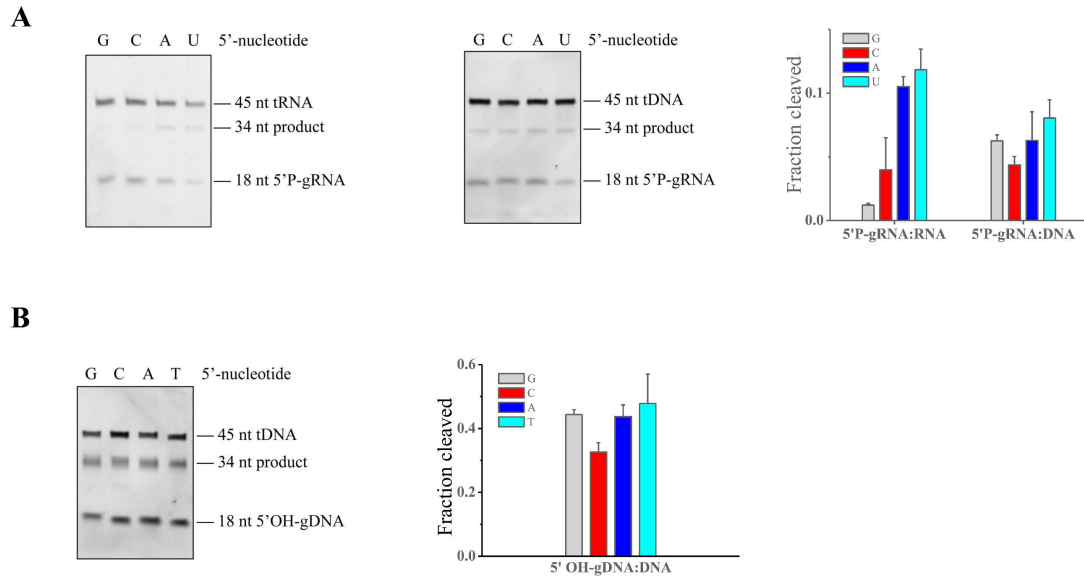

**Supplementary Figure S6.** Representative denaturing PAGEs (one of three independent experiments) showing KmAgo cleavage efficiencies with different nucleotides at the 5' end of the guide and their respective targets. Cleavage efficiencies from three independent experiments were quantified and plotted against 5' end nucleotide of the guide. (A) Representative denaturing PAGEs (one of three independent experiments) showing RNA cleavage efficiencies (left panel) and DNA cleavage efficiencies (middle panel) with different nucleotides at the 5' end of the 5'P-gRNA. Cleavage efficiencies from three independent experiments were quantified and plotted against 5' end nucleotide of the 5'P-gRNA (right panel). (B) Representative denaturing PAGE (one of three independent experiments) showing DNA cleavage efficiencies (left panel) with different nucleotides at the 5' end of the 5'OH-gDNA. Cleavage efficiencies from three independent experiments were quantified and plotted against 5' end nucleotide of the 5'OH-gRNA (right panel).

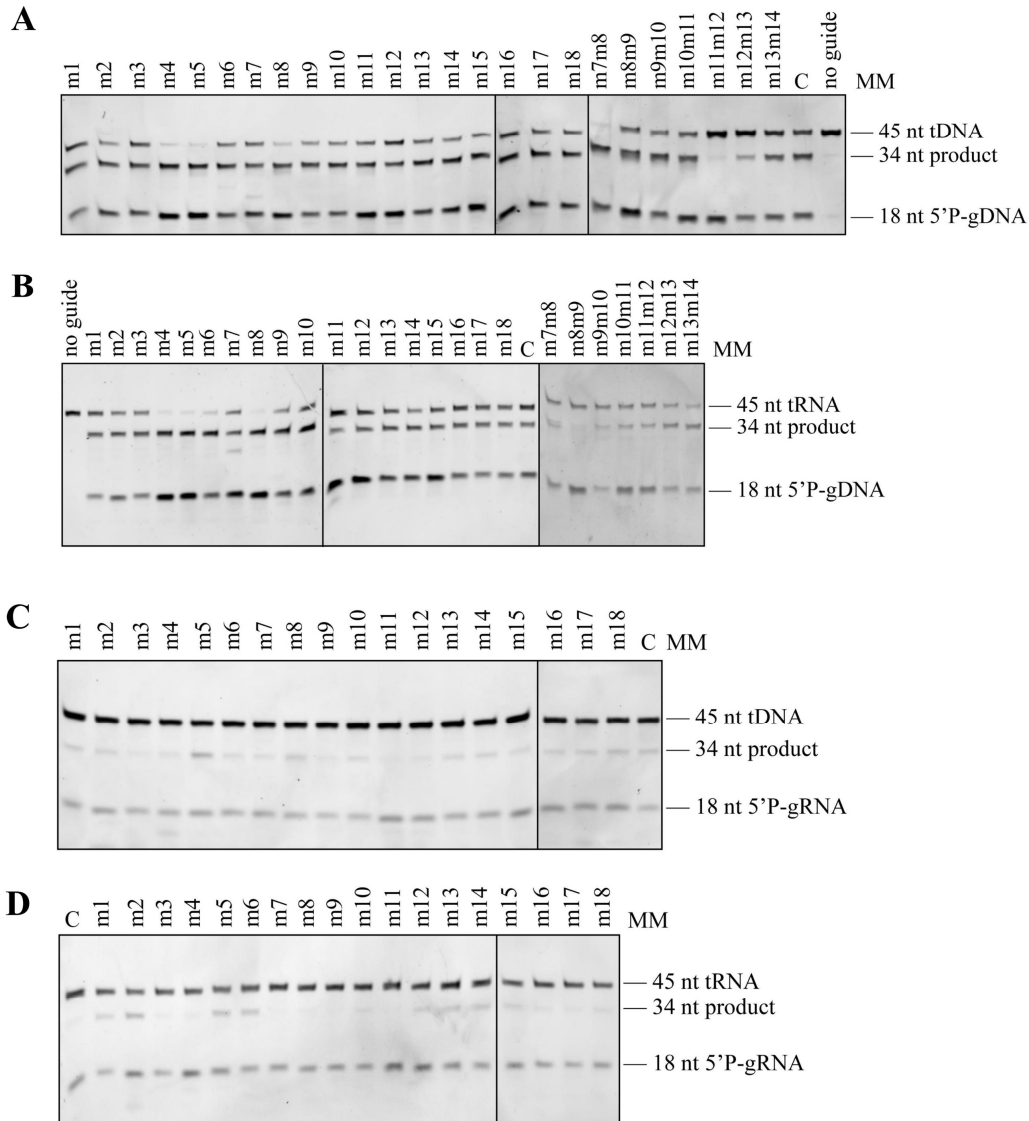

**Supplementary Figure S7.** Representative denaturing PAGE (one of three independent experiments) showing effects of mismatches in the guide-target duplex on the slicing activity of KmAgo. Quantification of the data (means and standard deviations from three independent experiments) is shown on the Figure 6. Representative denaturing PAGE (one of three independent experiments) showing effects of mismatches in the gDNA-tDNA (Figure S6A), gDNA-tRNA (Figure S6B), gRNA-tDNA (Figure S6C), and gRNA-tRNA (Figure S6D) duplex on the slicing activity of KmAgo. C, control reactions with guide variants containing no substitutions; MM, mismatch position.



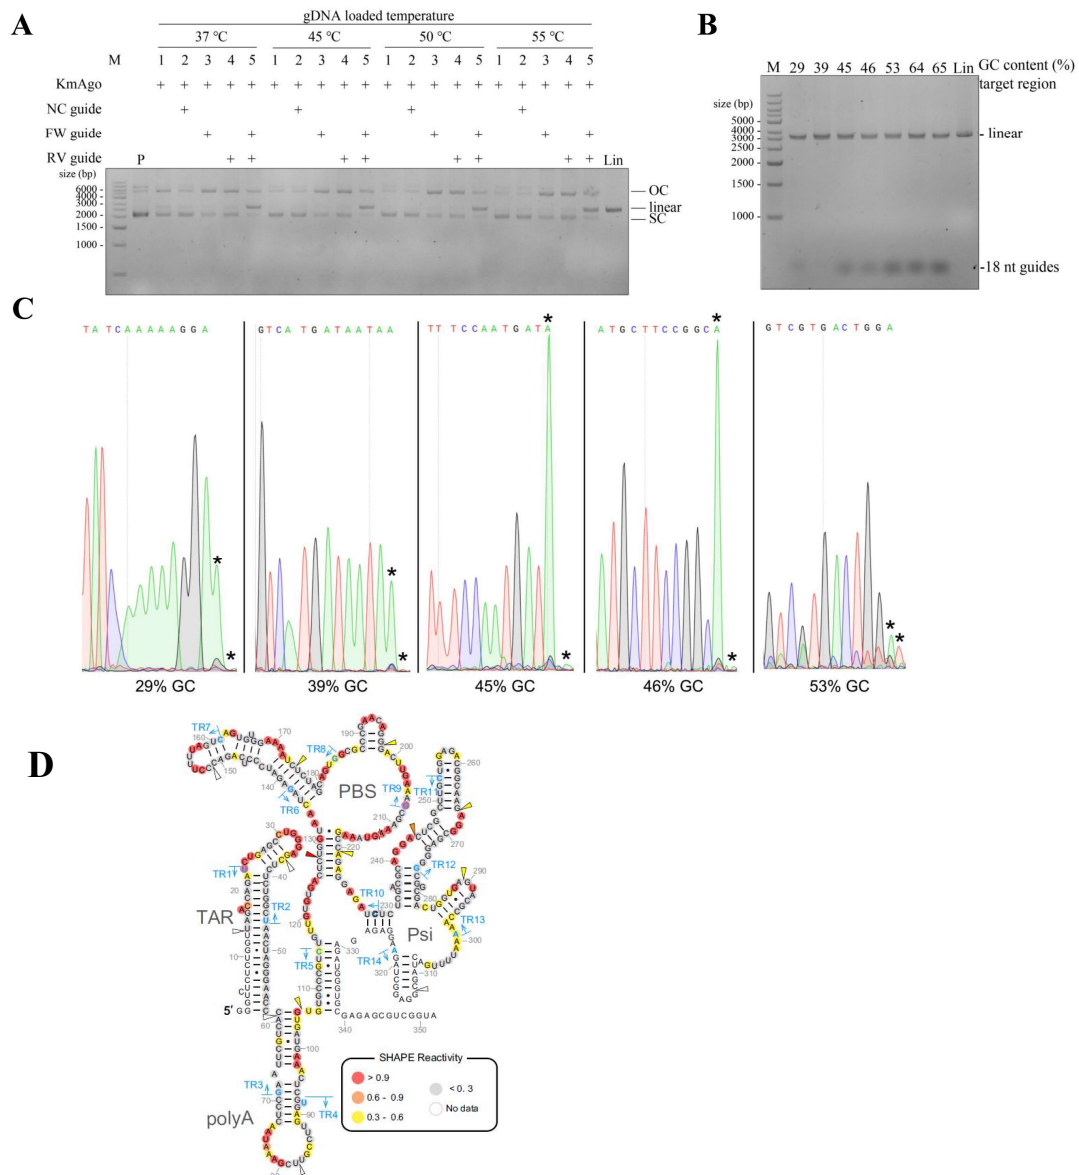

**Supplementary Figure S8.** (A) The effects of KmAgo-gDNA duplex preloaded temperature on plasmid cleavage activity. Plasmid cleavage assay performed by preloading KmAgo with the indicated 5'P-gDNAs at different temperatures for 30 min, followed by incubation with the target plasmid at 37 °C for 2 h, and analysis of the target plasmid by electrophoresis. gDNA preloaded temperature, the temperature of KmAgo-gDNA duplex formation stage; NC guide, C-gDNA; FW guide, 29GC-F; RV guide, 29GC-R; M, molecular weight marker; Lin, linearized plasmid; SC, supercoiled plasmid; OC, open circular plasmid. (B) KmAgo is unable to cleave linear plasmids. Plasmids were digested with *NdeI* or *Scal* before cleavage by two KmAgo-gDNA complexes. M, molecular weight marker; Lin, linearized plasmid. (C) Sanger sequencing analysis of pUC19 cleavage products by KmAgo-gDNA complexes. The position of cleavage site is indicated by the termination of primer extension in the sequencing reaction. Sequencing artifacts are shown with an asterisk above the corresponding peaks. (D) Secondary structure of HIV-1  $\Delta$ DIS 5'UTR predicted by SHAPE, which is copied from Figure 3C of Dayeh et al (1).

## Supplementary tables

**Table S1. List of let-7-derived sequences used in this study.**

| Oligonucleotide name | Sequence (5'-3')                                          | Description                                    |
|----------------------|-----------------------------------------------------------|------------------------------------------------|
| FAM-tDNA             | FAM-<br>AAACGACGGCCAGTGCCAAGCTT<br>ACTATACAACCTACTACCTCAT | 5' FAM labeled T-tDNA                          |
| M1                   | FAM-<br>AAACGACGGCCAGTGCCAAGCTT<br>ACTATACAACC            | 5' FAM labeled 34 nt DNA                       |
| FAM-tRNA             | FAM-<br>AAACGACGGCCAGUGCCAAGCUU<br>ACUAUACAACCUACUACCUCAU | 5' FAM labeled U-tRNA                          |
| M2                   | FAM-<br>AAACGACGGCCAGUGCCAAGCUU<br>ACUAUACAACC            | 5' FAM labeled 34 nt RNA                       |
| FAM-gRNA             | UGAGGUAGUAGGUUGUAU-FAM                                    | 3' FAM labeled U-gRNA                          |
| C-gDNA               | CGAGGTAGTAGGTTGTAT                                        | guide forms 5'-C pair with C-tDNA/C-tRNA       |
| T-gDNA               | TGAGGTAGTAGGTTGTAT                                        | guide forms 5'-T pair with T-tDNA/T-tRNA       |
| A-gDNA               | AGAGGTAGTAGGTTGTAT                                        | guide forms 5'-A pair with A-tDNA/A-tRNA       |
| G-gDNA               | GGAGGTAGTAGGTTGTAT                                        | guide forms 5'-G pair with G-tDNA/G-tRNA       |
| 33nt DNA product     | AAACGACGGCCAGTGCCAAGCTT<br>ACTATACAAC                     | 33 nt DNA marker                               |
| 34nt DNA product     | AAACGACGGCCAGTGCCAAGCTT<br>ACTATACAACC                    | 5' DNA product for 45 nt DNA target            |
| 35nt DNA product     | AAACGACGGCCAGTGCCAAGCTT<br>ACTATACAACCT                   | 35 nt DNA marker                               |
| A-tDNA               | AAACGACGGCCAGTGCCAAGCTT<br>ACTATACAACCTACTACCTCTT         | let-7 based 45 nt DNA target for A-gDNA/A-gRNA |
| G-tDNA               | AAACGACGGCCAGTGCCAAGCTT<br>ACTATACAACCTACTACCTCCT         | let-7 based 45 nt DNA target for G-gDNA/G-gRNA |
| C-tDNA               | AAACGACGGCCAGTGCCAAGCTT<br>ACTATACAACCTACTACCTCGT         | let-7 based 45 nt DNA target for C-gDNA/C-gRNA |
| T-tDNA               | AAACGACGGCCAGTGCCAAGCTT<br>ACTATACAACCTACTACCTCAT         | let-7 based 45 nt DNA target for T-gDNA/U-gRNA |
| C-gRNA               | CGAGGUAGUAGGUUGUAU                                        | guide forms 5'-C pair with C-tDNA/C-tRNA       |
| U-gRNA               | UGAGGUAGUAGGUUGUAU                                        | guide forms 5'-U pair with T-tDNA/T-tRNA       |

|                     |                                                   |                                                               |
|---------------------|---------------------------------------------------|---------------------------------------------------------------|
| A-gRNA              | AGAGGUAGUAGGUUGUAU                                | guide forms 5'-A pair with A-tDNA/A-tRNA                      |
| G-gRNA              | GGAGGUAGUAGGUUGUAU                                | guide forms 5'-G pair with G-tDNA/G-tRNA                      |
| C-tRNA              | AAACGACGGCCAGUGCCAAGCUU<br>ACUAUACAACCUACUACCUCGU | let-7 based 45 nt RNA target for C-gRNA/C-gDNA                |
| U-tRNA              | AAACGACGGCCAGUGCCAAGCUU<br>ACUAUACAACCUACUACCUCAU | let-7 based 45 nt RNA target for U-gDNA/U-gRNA                |
| A-tRNA              | AAACGACGGCCAGUGCCAAGCUU<br>ACUAUACAACCUACUACCUCUU | let-7 based 45 nt RNA target for A-gDNA/A-gRNA                |
| G-tRNA              | AAACGACGGCCAGUGCCAAGCUU<br>ACUAUACAACCUACUACCUCUU | let-7 based 45 nt RNA target for G-gDNA/G-gRNA                |
| 33nt<br>RNA product | AAACGACGGCCAGUGCCAAGCUU<br>ACUAUACAAC             | 33 nt RNA marker                                              |
| 34nt<br>RNA product | AAACGACGGCCAGUGCCAAGCUU<br>ACUAUACAACC            | 5' RNA product for 45 nt RNA target                           |
| 35nt<br>RNA product | AAACGACGGCCAGUGCCAAGCUU<br>ACUAUACAACCU           | 34 nt RNA marker                                              |
| gDNA_mm1            | GGAGGTAGTAGGTTGTAT                                | guide forms mismatched pair in position 1 with C-tDNA/C-tRNA  |
| gDNA_mm2            | CCAGGTAGTAGGTTGTAT                                | guide forms mismatched pair in position 2 with C-tDNA/C-tRNA  |
| gDNA_mm3            | CGTGGTAGTAGGTTGTAT                                | guide forms mismatched pair in position 3 with C-tDNA/C-tRNA  |
| gDNA_mm4            | CGACGTAGTAGGTTGTAT                                | guide forms mismatched pair in position 4 with C-tDNA/C-tRNA  |
| gDNA_mm5            | CGAGCTAGTAGGTTGTAT                                | guide forms mismatched pair in position 5 with C-tDNA/C-tRNA  |
| gDNA_mm6            | CGAGGAAGTAGGTTGTAT                                | guide forms mismatched pair in position 6 with C-tDNA/C-tRNA  |
| gDNA_mm7            | CGAGGTTGTAGGTTGTAT                                | guide forms mismatched pair in position 7 with C-tDNA/C-tRNA  |
| gDNA_mm8            | CGAGGTACTAGGTTGTAT                                | guide forms mismatched pair in position 8 with C-tDNA/C-tRNA  |
| gDNA_mm9            | CGAGGTAGAAGGTTGTAT                                | guide forms mismatched pair in position 9 with C-tDNA/C-tRNA  |
| gDNA_mm10           | CGAGGTAGTTGGTTGTAT                                | guide forms mismatched pair in position 10 with C-tDNA/C-tRNA |
| gDNA_mm11           | CGAGGTAGTACGTTGTAT                                | guide forms mismatched pair in position 11 with C-tDNA/C-tRNA |
| gDNA_mm12           | CGAGGTAGTAGCTTGTAT                                | guide forms mismatched pair in position 12 with C-tDNA/C-     |

|             |                    |                                                                      |
|-------------|--------------------|----------------------------------------------------------------------|
|             |                    | tRNA                                                                 |
| gDNA_mm13   | CGAGGTAGTAGGATGTAT | guide forms mismatched pair in position 13 with C-tDNA/C-tRNA        |
| gDNA_mm14   | CGAGGTAGTAGGTAGTAT | guide forms mismatched pair in position 14 with C-tDNA/C-tRNA        |
| gDNA_mm15   | CGAGGTAGTAGGTTCTAT | guide forms mismatched pair in position 15 with C-tDNA/C-tRNA        |
| gDNA_mm16   | CGAGGTAGTAGGTTGAAT | guide forms mismatched pair in position 16 with C-tDNA/C-tRNA        |
| gDNA_mm17   | CGAGGTAGTAGGTTGTTT | guide forms mismatched pair in position 17 with C-tDNA/C-tRNA        |
| gDNA_mm18   | CGAGGTAGTAGGTTGTAA | guide forms mismatched pair in position 18 with C-tDNA/C-tRNA        |
| gDNA_m7m8   | CGAGGTTCTAGGTTGTAT | guide forms mismatched pair in position 7 and 8 with C-tDNA/C-tRNA   |
| gDNA_m8m9   | CGAGGTACAAGGTTGTAT | guide forms mismatched pair in position 8 and 9 with C-tDNA/C-tRNA   |
| gDNA_m9m10  | CGAGGTAGATGGTTGTAT | guide forms mismatched pair in position 9 and 10 with C-tDNA/C-tRNA  |
| gDNA_m10m11 | CGAGGTAGTACGTTGTAT | guide forms mismatched pair in position 10 and 11 with C-tDNA/C-tRNA |
| gDNA_m11m12 | CGAGGTAGTTCCTTGTAT | guide forms mismatched pair in position 11 and 12 with C-tDNA/C-tRNA |
| gDNA_m12m13 | CGAGGTAGTTGCATGTAT | guide forms mismatched pair in position 12 and 13 with C-tDNA/C-tRNA |
| gDNA_m13m14 | CGAGGTAGTTGGAAGTAT | guide forms mismatched pair in position 13 and 14 with C-tDNA/C-tRNA |
| gRNA_mm1    | GGAGGUAGUAGGUUGUAU | guide forms mismatched pair in position 1 with C-tDNA/C-tRNA         |
| gRNA_mm2    | CCAGGUAGUAGGUUGUAU | guide forms mismatched pair in position 2 with C-tDNA/C-tRNA         |

|            |                    |                                                               |
|------------|--------------------|---------------------------------------------------------------|
| gRNA_mm3   | CGUGGUAGUAGGUUGUAU | guide forms mismatched pair in position 3 with C-tDNA/C-tRNA  |
| gRNA_mm4   | CGACGUAGUAGGUUGUAU | guide forms mismatched pair in position 4 with C-tDNA/C-tRNA  |
| gRNA_mm5   | CGAGCUAGUAGGUUGUAU | guide forms mismatched pair in position 5 with C-tDNA/C-tRNA  |
| gRNA_mm6   | CGAGGAAGUAGGUUGUAU | guide forms mismatched pair in position 6 with C-tDNA/C-tRNA  |
| gRNA_mm7   | CGAGGUUGUAGGUUGUAU | guide forms mismatched pair in position 7 with C-tDNA/C-tRNA  |
| gRNA_mm8   | CGAGGUACUAGGUUGUAU | guide forms mismatched pair in position 8 with C-tDNA/C-tRNA  |
| gRNA_mm9   | CGAGGUAGAAGGUUGUAU | guide forms mismatched pair in position 9 with C-tDNA/C-tRNA  |
| gRNA_mm10  | CGAGGUAGUUGGUUGUAU | guide forms mismatched pair in position 10 with C-tDNA/C-tRNA |
| gRNA_mm11  | CGAGGUAGUACGUUGUAU | guide forms mismatched pair in position 11 with C-tDNA/C-tRNA |
| gRNA_mm12  | CGAGGUAGUAGCUUGUAU | guide forms mismatched pair in position 12 with C-tDNA/C-tRNA |
| gRNA_mm13  | CGAGGUAGUAGGAUGUAU | guide forms mismatched pair in position 13 with C-tDNA/C-tRNA |
| gRNA_mm14  | CGAGGUAGUAGGUAGUAU | guide forms mismatched pair in position 14 with C-tDNA/C-tRNA |
| gRNA_mm15  | CGAGGUAGUAGGUUCUAU | guide forms mismatched pair in position 15 with C-tDNA/C-tRNA |
| gRNA_mm16  | CGAGGUAGUAGGUUGAAU | guide forms mismatched pair in position 16 with C-tDNA/C-tRNA |
| gRNA_mm17  | CGAGGUAGUAGGUUGUUU | guide forms mismatched pair in position 17 with C-tDNA/C-tRNA |
| gRNA_mm18  | CGAGGUAGUAGGUUGUAA | guide forms mismatched pair in position 18 with C-tDNA/C-tRNA |
| 8nt C-gDNA | CGAGGTAG           | 8 nt guide pair with C-tDNA/C-tRNA                            |
| 9nt C-gDNA | CGAGGTAGT          | 9 nt guide pair with C-tDNA/C-                                |

|             |                                              |                                     |
|-------------|----------------------------------------------|-------------------------------------|
|             |                                              | tRNA                                |
| 10nt C-gDNA | CGAGGTAGTA                                   | 10 nt guide pair with C-tDNA/C-tRNA |
| 11nt C-gDNA | CGAGGTAGTAG                                  | 11 nt guide pair with C-tDNA/C-tRNA |
| 12nt C-gDNA | CGAGGTAGTAGG                                 | 12 nt guide pair with C-tDNA/C-tRNA |
| 13nt C-gDNA | CGAGGTAGTAGGT                                | 13 nt guide pair with C-tDNA/C-tRNA |
| 14nt C-gDNA | CGAGGTAGTAGGTT                               | 14 nt guide pair with C-tDNA/C-tRNA |
| 15nt C-gDNA | CGAGGTAGTAGGTTG                              | 15 nt guide pair with C-tDNA/C-tRNA |
| 16nt C-gDNA | CGAGGTAGTAGGTTGT                             | 16 nt guide pair with C-tDNA/C-tRNA |
| 17nt C-gDNA | CGAGGTAGTAGGTTGTA                            | 17 nt guide pair with C-tDNA/C-tRNA |
| 19nt C-gDNA | CGAGGTAGTAGGTTGTATA                          | 19 nt guide pair with C-tDNA/C-tRNA |
| 20nt C-gDNA | CGAGGTAGTAGGTTGTATAG                         | 20 nt guide pair with C-tDNA/C-tRNA |
| 21nt C-gDNA | CGAGGTAGTAGGTTGTATAGT                        | 21 nt guide pair with C-tDNA/C-tRNA |
| 25nt C-gDNA | CGAGGTAGTAGGTTGTATAGTAAG<br>C                | 25 nt guide pair with C-tDNA/C-tRNA |
| 30nt C-gDNA | CGAGGTAGTAGGTTGTATAGTAAG<br>CTTGGC           | 30 nt guide pair with C-tDNA/C-tRNA |
| 40nt C-gDNA | CGAGGTAGTAGGTTGTATAGTAAG<br>CTTGGCACTGGCCGTC | 40 nt guide pair with C-tDNA/C-tRNA |
| 12nt C-gRNA | CGAGGUAGUAGG                                 | 12 nt guide pair with C-tDNA/C-tRNA |
| 13nt C-gRNA | CGAGGUAGUAGGU                                | 13 nt guide pair with C-tDNA/C-tRNA |
| 14nt C-gRNA | CGAGGUAGUAGGUU                               | 14 nt guide pair with C-tDNA/C-tRNA |
| 15nt C-gRNA | CGAGGUAGUAGGUUG                              | 15 nt guide pair with C-tDNA/C-tRNA |
| 16nt C-gRNA | CGAGGUAGUAGGUUGU                             | 16 nt guide pair with C-tDNA/C-tRNA |
| 17nt C-gRNA | CGAGGUAGUAGGUGUA                             | 17 nt guide pair with C-tDNA/C-tRNA |
| 19nt C-gRNA | CGAGGUAGUAGGUUGUAUA                          | 19 nt guide pair with C-tDNA/C-tRNA |

|             |                                         |                                     |
|-------------|-----------------------------------------|-------------------------------------|
| 20nt C-gRNA | CGAGGUAGUAGGUUGUAUAG                    | 20 nt guide pair with C-tDNA/C-tRNA |
| 21nt C-gRNA | CGAGGUAGUAGGUUGUAUAGU                   | 21 nt guide pair with C-tDNA/C-tRNA |
| 25nt C-gRNA | CGAGGUAGUAGGUUGUAUAGUAGC                | 25 nt guide pair with C-tDNA/C-tRNA |
| 30nt C-gRNA | CGAGGUAGUAGGUUGUAUAGUAGCUUGGC           | 30 nt guide pair with C-tDNA/C-tRNA |
| 40nt C-gRNA | CGAGGUAGUAGGUUGUAUAGUAGCUUGGCACUGGCCGUC | 40 nt guide pair with C-tDNA/C-tRNA |

**Table S2. Sequences of HIV-1  $\Delta$ DIS 5'UTR (1).**

5' pGGGUCUCUCUGGUUAGACCAGAUCUGAGCCUGGGAGCUCUCUGGCCUAACUAGG  
GAACCCACUGCUUAAGCCUCAAUAAAGCUUGCCUUGAGUGCUCUAAAGUAGUGUGGC  
CCGUCUGUUGUGUGACUCUGGUAAACUAGAGAUCUCCUCAGACCCUUUUAGUCAGUGUG  
GAAAUCUCUAGCAGUGGGCGCCCGAACAGGGACUUGAAAGCGAAAGUAAAGCCAGAG  
GAGAUUCUCUCGACGCAGGACUCGGCUUGCUGGAGACGGCAAGAGGGCGAGGGGGCGGC  
GACUGGUGAGUACGCCAAAAUUUUGACUAGCGGAGGCUAGAAGGAGAGAGAUGGGU  
GCGAGAGCGUCGGUA

**Table S3. List of gDNAs targeting HIV-1  $\Delta$ DIS 5'UTR.**

| gDNA#   | Sequence (5'-3')    | Target region | 5' product length (nt) |
|---------|---------------------|---------------|------------------------|
| gDNA_1  | ACTCAAGGCAAGCTTTAT  | 70-87         | 82                     |
| gDNA_2  | GACGGGCACACACTACTT  | 93-110        | 105                    |
| gDNA_3  | CTAGTTACCAGAGTCACA  | 116-133       | 128                    |
| gDNA_4  | GACTAAAAGGGTCTGAGG  | 139-156       | 151                    |
| gDNA_5  | CACTGCTAGAGATTTTCC  | 162-179       | 174                    |
| gDNA_6  | CTTTCAAGTCCCTGTTTCG | 185-202       | 197                    |
| gDNA_7  | GATCTCCTCTGGCTTTAC  | 208-225       | 220                    |
| gDNA_8  | GCAAGCCGAGTCCTGCGT  | 231-248       | 243                    |
| gDNA_9  | CCCCTCGCCTCTTGCCGT  | 254-271       | 266                    |
| gDNA_10 | TTTGGCGTACTCACCAGT  | 277-294       | 289                    |
| gDNA_11 | TCTAGCCTCCGCTAGTCA  | 300-317       | 312                    |

**Table S4. List of gDNAs targeting plasmid pUC19.**

| gDNA   | Sequence (5'-3')   | GC content of target region (%) |
|--------|--------------------|---------------------------------|
| 29GC-F | TCAAAAAGGATCTTCACC | 29                              |
| 29GC-R | TAGGTGAAGATCCTTTTT | 29                              |
| 39GC-F | AAGAAACCATTATTATCA | 39                              |
| 39GC-R | CATGATAATAATGGTTTC | 39                              |
| 45GC-F | AAAAGTGCTCATCATTGG | 45                              |
| 45GC-R | TTCCAATGATGAGCACTT | 45                              |
| 46GC-F | CAACATACGAGCCGGAAG | 46                              |

|        |                     |    |
|--------|---------------------|----|
| 46GC-R | TGCTTCCGGCTCGTATGT  | 46 |
| 53GC-F | CAGGGTTTTCCAGTCAC   | 53 |
| 53GC-R | TCGTGACTGGGAAAACCC  | 53 |
| 64GC-F | CGCTCGGTCGTTCCGGCTG | 64 |
| 64GC-R | CGCAGCCGAACGACCGAG  | 64 |
| 65GC-F | TCGTGCGCTCTCCTGTTC  | 65 |
| 65GC-R | CGGAACAGGAGAGCGCAC  | 65 |



## REFERENCES

1. Dayeh,D.M., Cantara,W.A., Kitzrow,J.P., Musier-Forsyth,K. and Nakanishi,K. (2018) Argonaute-based programmable RNase as a tool for cleavage of highly-structured RNA. *Nucleic Acids Res*, 46, e98.
